# Supplementary material for: A highly efficient red electrophosphorescent iridium(iii) complex containing phenyl quinazoline ligand in polymer light-emitting diodes
Source: Royal Society of Chemistry journal article supplement (doi:10.1039/c2jm15160j), 2012-01-01
Supplement: c2jm15160j.pdf [file c2jm15160j.pdf]

# **A highly efficient red electrophosphorescent iridium(III) complex containing phenyl quinazoline ligand in polymer light-emitting diodes**

**Qunbo Mei<sup>\*a</sup>, Lingxia Wang,<sup>a</sup> Yuanhui Guo,<sup>a</sup> Jiena Weng,<sup>a</sup> Fang Yan,<sup>a</sup> Bo Tian,<sup>a</sup> and Bihai Tong<sup>\*b</sup>**

*<sup>a</sup>Key Laboratory for Organic Electronics & Information Displays (KLOEID), Institute of Advanced Materials (IAM), Nanjing University of Posts and Telecommunications (NUPT), Nanjing 210046, China*

*<sup>b</sup>College of Metallurgy and Resources, Anhui University of Technology, Ma'anshan, Anhui 243002, P. R. China;*

\* Corresponding author. e-mail: iamqbmei@njupt.edu.cn; tongbihai@ahut.edu.cn

## **Contents:**

- 1. PL quantum efficiency of (PQxD)<sub>2</sub>Ir(pic) in CH<sub>2</sub>Cl<sub>2</sub> solution (Figure S1)**
- 2. PL spectra of (PQxD)<sub>2</sub>Ir(pic) in different doping concentrations (Figure S3)**
- 3. PL quantum efficiency of (PQxD)<sub>2</sub>Ir(pic)/PVK-PBD films (Figure S3)**
- 4. <sup>1</sup>H NMR and <sup>13</sup>C NMR data (Figure S4- Figure S8)**
- 5. GC-MS and ESI-MS data (Figure S9- Figure S12)**

### PL quantum efficiency $\Phi$ :

The PL quantum efficiency of  $(\text{PQxD})_2\text{Ir}(\text{pic})$  was measured in  $\text{CH}_2\text{Cl}_2$  solution using Tris(2,2'-bipyridyl)ruthenium(II) ion ( $\text{Ru}(\text{bipy})_3^{2+}$ ) in aqueous solution as the reference ( $\Phi_s = 0.042 \pm 0.002$ )<sup>1</sup> in the same apparatus. The PL quantum efficiency was calculated with the following equation<sup>2-3</sup>:

$$\Phi_x = \Phi_s \times (S_s/A_s)^{-1} \times (S_x/A_x) \times (n_s/n_x)^2$$

Where:  $\Phi$  is PL quantum efficiency, the s subscript refers to the sample and x to the standard, A is absorbance at the excitation wavelength, S is the integrated emission area across the band and n is the refractive index of the solvent containing the sample.

The fluorescence emission spectra of the standard and sample were determined on the same apparatus under the same excitation intensity. Absorbance of sample and standard must be similar and small (e.g. below 0.05). The concentration of the standard solution and sample solution are almost limited, so  $n_s$  and  $n_x$  can be replaced by solvent. The refractive index of water and  $\text{CH}_2\text{Cl}_2$  were known as 1.333 and 1.424 at room temperature, respectively. The PL quantum efficiency of  $(\text{PQxD})_2\text{Ir}(\text{pic})$  in  $\text{CH}_2\text{Cl}_2$  solution was determined to be 0.116.

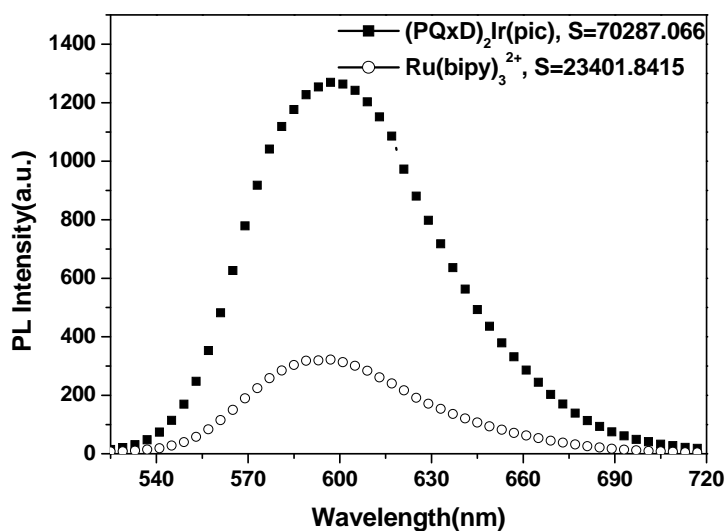

**Figure S1.** PL spectra of  $(\text{PQxD})_2\text{Ir}(\text{pic})$  in  $\text{CH}_2\text{Cl}_2$  solution and  $\text{Ru}(\text{bipy})_3^{2+}$  in aqueous solution at room temperature ( $\lambda_{\text{em}}=420\text{nm}$ ).

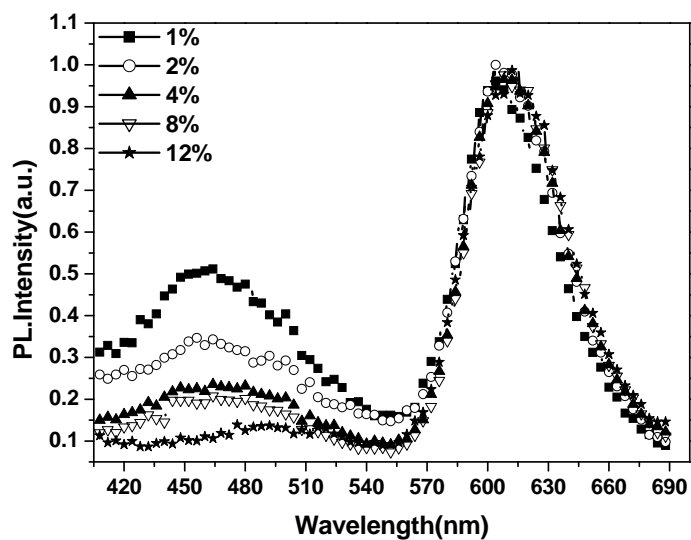

Figure S2. PL spectra of  $(\text{PQxD})_2\text{Ir}(\text{pic})/\text{PVK-PBD}$  films with different doping concentrations.

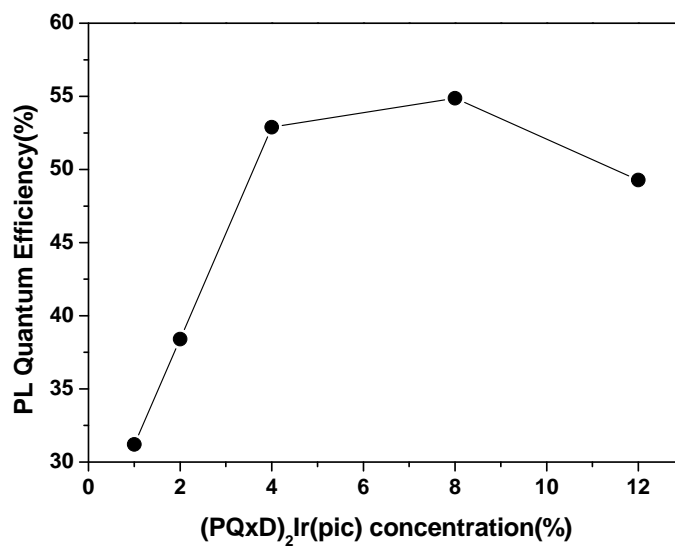

Figure S3. PL quantum efficiency of  $(\text{PQxD})_2\text{Ir}(\text{pic})/\text{PVK-PBD}$  films with different doping concentrations.

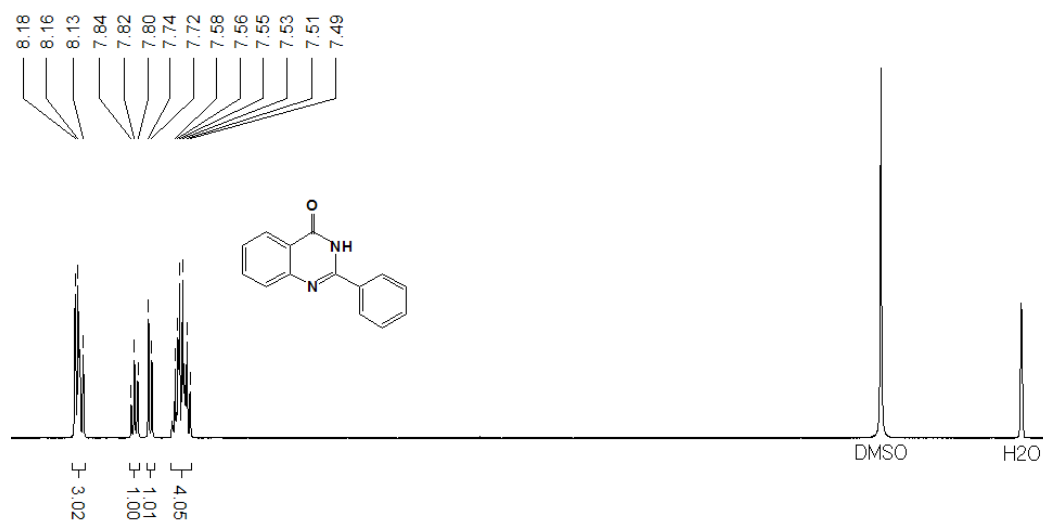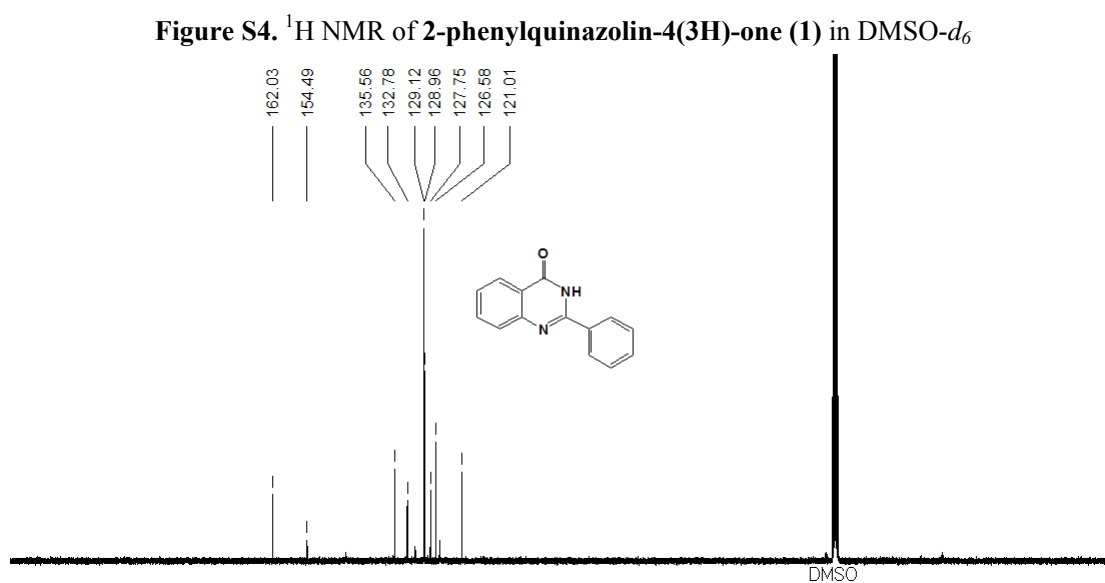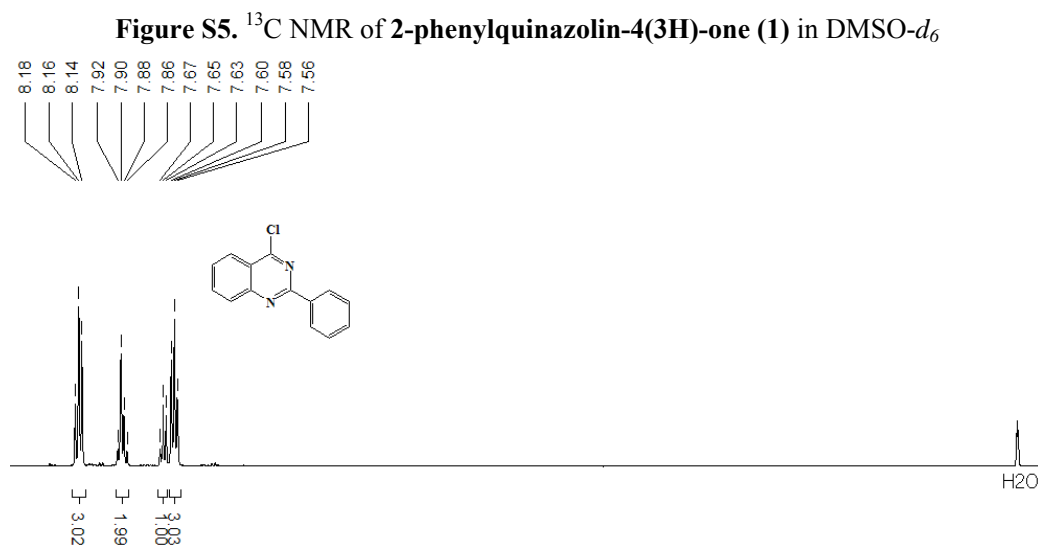



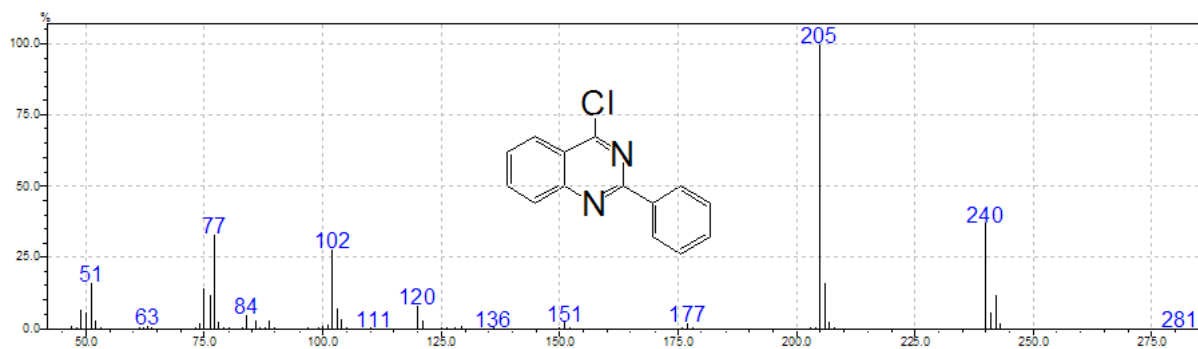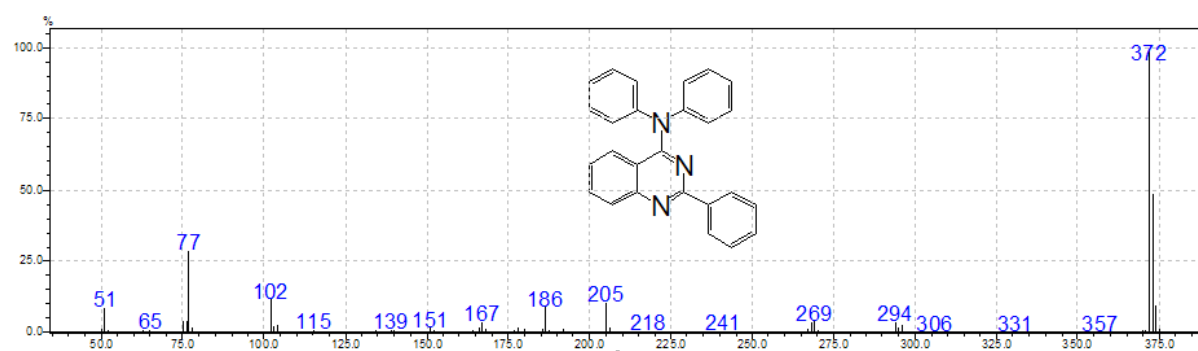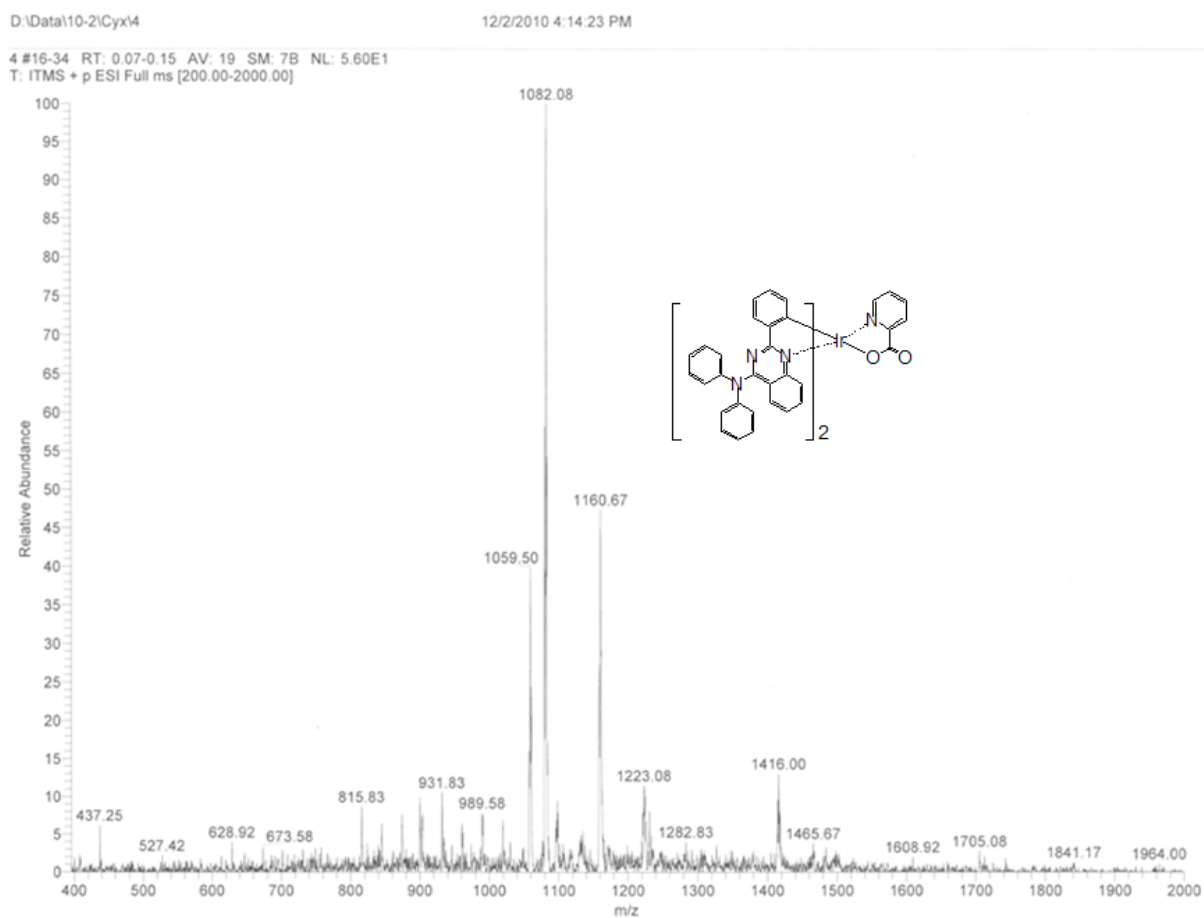

### References:

1. J. Van Houten and R. J. Watts, *Journal of the American Chemical Society*, 1976, **98**, 4853-4858.
2. D. F., Eaton. *Pure Appl. Chem.* 1988, **60**, 1107-1114.
3. J. Huang, *Synthesis, Characterization and Electroluminescent Properties of Solution-Processable Small Red Light-emitting Molecular Materials*, Guang Zhou, South China University of Technology, **2011.06.09**, 34-35.
